# Supplementary material for: The Cyclooxigenase-2 Inhibitor Parecoxib Prevents Epidermal Dysplasia in HPV16-Transgenic Mice: Efficacy and Safety Observations
Source: Int J Mol Sci. 2019 Aug 10;20(16):3902. doi: 10.3390/ijms20163902 (PMC6720853; doi:10.3390/ijms20163902)
Supplement: Supplementary file 1 [file ijms-20-03902-s001.pdf]

**Supplementary table 1.** Number and percentage of animals with change in body condition, coat and grooming, and ears, eyes and whiskers in different groups.

| Group        |                        | Body Condition |                |                |                | Coat and grooming |   |                |                |                | Eyes, Ears and Whiskers |   |                |                |                |                |
|--------------|------------------------|----------------|----------------|----------------|----------------|-------------------|---|----------------|----------------|----------------|-------------------------|---|----------------|----------------|----------------|----------------|
|              |                        |                | -1 Week        | 0 Week         | 1 Week         | 2 Week            |   | -1 Week        | 0 Week         | 1 Week         | 2 Week                  |   | -1 Week        | 0 Week         | 1 Week         | 2 Week         |
| I (n = 10)   | Wild-type<br>parecoxib | 0              | 10<br>(100.0%) | 10<br>(100.0%) | 10<br>(100.0%) | 10<br>(100.0%)    | 0 | 10<br>(100.0%) | 10<br>(100.0%) | 10<br>(100.0%) | 10<br>(100.0%)          | 0 | 10<br>(100.0%) | 10<br>(100.0%) | 10<br>(100.0%) | 10<br>(100.0%) |
|              |                        | 1              |                |                |                |                   | 1 |                |                |                |                         | 1 |                |                |                |                |
|              |                        | 2              |                |                |                |                   | 2 |                |                |                |                         | 2 |                |                |                |                |
|              |                        |                |                |                |                |                   | 3 |                |                |                |                         |   |                |                |                |                |
| II (n = 11)  | Wild-type<br>control   | 0              | 11<br>(100.0%) | 11<br>(100.0%) | 11<br>(100.0%) | 11<br>(100.0%)    | 0 | 11<br>(100.0%) | 11<br>(100.0%) | 11<br>(100.0%) | 11<br>(100.0%)          | 0 | 11<br>(100.0%) | 11<br>(100.0%) | 11<br>(100.0%) | 11<br>(100.0%) |
|              |                        | 1              |                |                |                |                   | 1 |                |                |                |                         | 1 |                |                |                |                |
|              |                        | 2              |                |                |                |                   | 2 |                |                |                |                         | 2 |                |                |                |                |
|              |                        |                |                |                |                |                   | 3 |                |                |                |                         |   |                |                |                |                |
| III (n = 11) | HPV<br>parecoxib       | 0              | 11<br>(100.0%) | 8<br>(72.7%)   | 8<br>(72.7%)   | 7<br>(63.6%)      | 0 | 11<br>(100.0%) | 11<br>(100.0%) | 9<br>(81.8%)   | 10<br>(90.9%)           | 0 | 10<br>(90.9%)  | 10<br>(90.9%)  | 8<br>(72.7%)   | 7<br>(63.6%)   |
|              |                        | 1              |                | 3<br>(27.3%)   | 3<br>(27.3%)   | 4<br>(36.4%)      | 1 |                |                | 2<br>(18.2%)   | 1<br>(9.10%)            | 1 | 1<br>(9.10%)   | 1<br>(9.10%)   | 3<br>(27.3%)   | 4<br>(36.4%)   |
|              |                        | 2              |                |                |                |                   | 2 |                |                |                |                         | 2 |                |                |                |                |
|              |                        |                |                |                |                |                   | 3 |                |                |                |                         |   |                |                |                |                |
| IV (n = 11)  | HPV<br>control         | 0              | 11<br>(100.0%) | 10<br>(90.9%)  | 10<br>(90.9%)  | 10<br>(90.9%)     | 0 | 11<br>(100.0%) | 11<br>(100.0%) | 10<br>(90.9%)  | 8<br>(72.7%)            | 0 | 11<br>(100.0%) | 11<br>(100.0%) | 10<br>(90.9%)  | 11<br>(100.0%) |
|              |                        | 1              |                | 1<br>(9.10%)   | 1<br>(9.10%)   | 1<br>(9.10%)      | 1 |                |                | 1<br>(9.10%)   | 3<br>(27.3%)            | 1 |                |                | 1<br>(9.10%)   |                |
|              |                        | 2              |                |                |                |                   | 2 |                |                |                |                         | 2 |                |                |                |                |
|              |                        |                |                |                |                |                   | 3 |                |                |                |                         |   |                |                |                |                |
